# Supplementary material for: Solvent engineering towards controlled grain growth in perovskite planar heterojunction solar cells
Source: Royal Society of Chemistry journal article supplement (doi:10.1039/c5nr02866c), 2015-01-01
Supplement: c5nr02866c1.pdf [file c5nr02866c1.pdf]

Supporting Information

for

**Solvent Engineering Towards Controlled Grain Growth in  
Perovskite Planar Heterojunction Solar Cells**

Yaoguang Rong,<sup>a</sup> Zhongjia Tang,<sup>bc</sup> Yufeng Zhao,<sup>a</sup> Xin Zhong,<sup>b</sup> Swaminathan Venkatesan,<sup>a</sup> Harrison Graham,<sup>a</sup> Matthew Patton,<sup>d</sup> Yan Jing,<sup>a</sup> Arnold M. Guloy<sup>\*bc</sup> and Yan Yao<sup>\*ac</sup>

<sup>a</sup>Department of Electrical and Computer Engineering and Materials Science and Engineering Program, University of Houston, Houston, Texas 77204, USA.

<sup>b</sup>Department of Chemistry, University of Houston, Houston, Texas 77204, USA.

<sup>c</sup>Texas Center for Superconductivity at University of Houston, Houston, Texas, 77204, USA.

<sup>d</sup>Department of Chemical and Biomolecular Engineering, University of Houston, Houston, Texas 77204, USA.

\* Corresponding author e-mail: [yyao4@uh.edu](mailto:yyao4@uh.edu) (Y.Y.) and [aguloy@uh.edu](mailto:aguloy@uh.edu) (A.M.G.)

## 1. Experimental details

**Materials and preparation of precursor solutions:** Lead iodide ( $\text{PbI}_2$ ), anhydrous *N,N*-dimethylformamide (DMF), dimethylsulfoxide (DMSO) and toluene were purchased from Sigma-Aldrich and used without further purification. Methylammonium iodide (MAI) was synthesized according to the literature<sup>[1]</sup>. The precursor solution was prepared by dissolving 1.25 M MAI and  $\text{PbI}_2$  mixture (molar ratio 1:1) in pure DMF, DMSO or DMF:DMSO mixed solvent at 1:3 volume ratio at 70 °C.

**Device fabrication:** PEDOT:PSS was spin-coated on cleaned ITO substrates at 4000 rpm for 30 s after UV-ozone treatment for 15 min, and dried at 115 °C for 20 min. The  $\text{MAPbI}_3$  precursor solution were spin-coated on top of PEDOT:PSS layer at 1000 rpm for 10 s and 5000 rpm for 5-30 s. Toluene (200  $\mu\text{l}$  for DMF and 400  $\mu\text{l}$  for DMF/DMSO mixture solvent) was dripped at the center of the substrate with different delay time during the 5000 rpm spin-coating process. After solvent treatment, the films were transferred onto a hotplate and annealed at 100 °C for 15 min. After cooling down to room temperature (RT), 40  $\text{mg ml}^{-1}$  dichlorinebenzene (DCB) solution of PCBM was spin-coated on top of perovskite films at 1800 rpm for 30 s, and dried at 80 °C for 20 min. Finally, 8 nm thick bathocuproine (BCP) and 100 nm thick Al were thermal evaporated with a mask under high vacuum ( $2 \times 10^{-6}$  Pa). The active device area is  $0.09 \text{ cm}^2$ .

**Characterization:** The X-ray diffraction (XRD) spectra of the perovskite films were measured using a Rigaku diffractometer with  $\text{Cu K}\alpha$  radiation (1.5405 Å). Crystallographic data for compound  $[\text{CH}_3\text{NH}_3]_2\text{Pb}_3\text{I}_8 \cdot 2\text{DMSO}$  was collected using a Siemens SMART platform diffractometer (monochromatized  $\text{Mo K}_{\alpha 1}$  radiation;  $\lambda = 0.71073 \text{ Å}$ ) equipped with an APEX II CCD area detector. The data was integrated and unit cell was refined using the SAINT program<sup>[2]</sup>. An absorption correction was applied using Bruker Apex2 software package<sup>[3]</sup>. The structure was solved by direct methods and refined by full-matrix least-squares calculations on  $F^2$ . All calculations were made with using the SHELXTL programs package.<sup>[4]</sup> The FTIR spectra were recorded on a Thermo Scientific spectrophotometer (Nicolet iS5). The ultraviolet-visible (UV-Vis) absorption spectra were measured using an Agilent Technologies spectrophotometer (Cary 60). Atomic Force Microscopy (AFM) tests were performed using Bruker's Innova-IRIS AFM system in tapping mode. The current density-voltage ( $J$ - $V$ ) characteristics were measured using a Keithley 2400 source-meter under AM1.5G illumination at  $100 \text{ mW cm}^{-2}$  from a Newport solar simulator calibrated with a Si diode (KG-5 filter). The  $J$ - $V$  curves were obtained through reverse scan (1.0 V to -0.2 V) and forward scan (-0.2 V to 1.0 V) with step size of 20 mV and the delay time between 50 and 400 ms. External quantum efficiencies (EQE) were measured by an EQE system in the AC mode (Enli Technology).

## 2. Simulated powder XRD pattern based on refined crystal structure of $\text{MA}_2\text{Pb}_3\text{I}_8 \cdot 2\text{DMSO}$

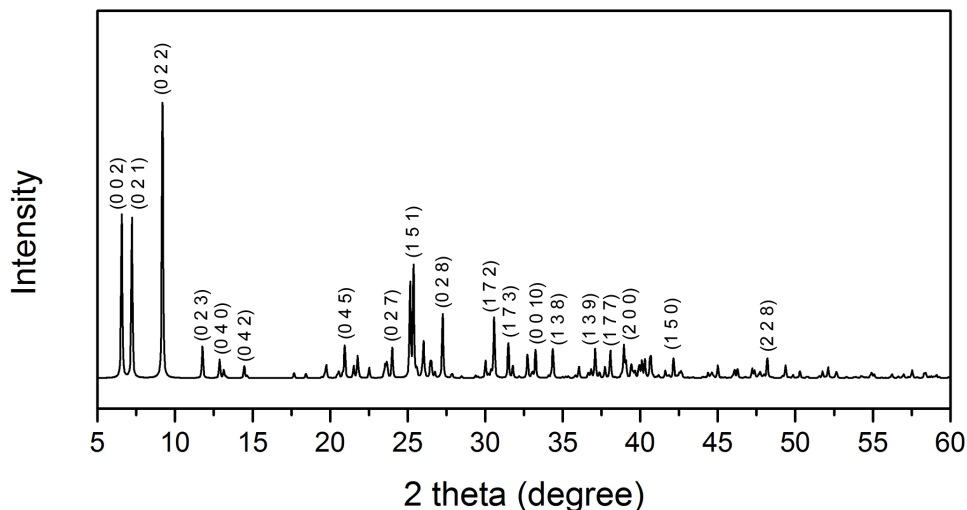

Figure S1. Simulated powder diffraction pattern of  $\text{MA}_2\text{Pb}_3\text{I}_8 \cdot 2\text{DMSO}$ .

## 3. FTIR spectra of intermediate phase and crystalline perovskite

The presence of DMF or DMSO molecule in the intermediate phase film is confirmed by Fourier transform infrared spectroscopy (FTIR), as shown in Fig. S1. For sample A, the peak located at  $1020\text{ cm}^{-1}$  is assigned to S=O stretching vibration. For thin film C, strong bands located at  $1432$  and  $1377\text{ cm}^{-1}$  are assigned to symmetrical and asymmetrical C-H bending vibration and the band at  $1637\text{ cm}^{-1}$  is assigned to C=O stretching vibration of DMF molecules. After thermal annealing, the intensities of peaks originated from DMF or DMSO significantly reduces, indicating the removal of solvent molecules and formation of  $\text{MAPbI}_3$ .

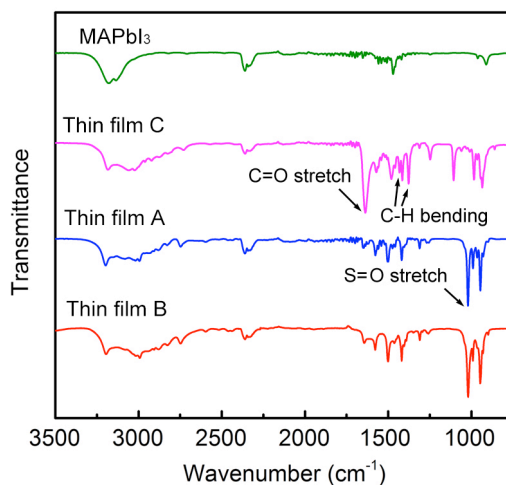

Figure S2. FTIR spectra of intermediate phase film obtained with DMSO (Thin film A), DMF/DMSO (Thin film B), DMF (Thin film C), and annealed  $\text{MAPbI}_3$  perovskite film on glass substrates.

#### 4. I-V curves and $J_{sc}$ and $V_{oc}$ dependence on light intensity

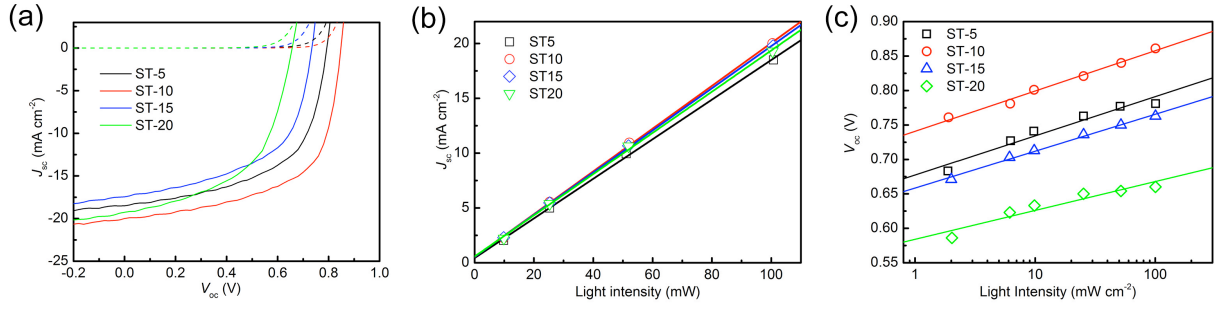

Figure S3. (a)  $J$ - $V$  curves of the devices fabricated with different delay time under 1 sun illumination and in the dark; (b)  $J_{sc}$  dependence of the devices on light intensity (0.02-1.0 Sun); (c)  $V_{oc}$  dependence of the devices on light intensity (0.02-1.0 Sun).

## 5. Results of the single crystal X-ray investigations of [CH<sub>3</sub>NH<sub>3</sub>]<sub>2</sub>Pb<sub>3</sub>I<sub>8</sub>·2DMSO

**Table S1.** Crystal data and structure refinement for [CH<sub>3</sub>NH<sub>3</sub>]<sub>2</sub>Pb<sub>3</sub>I<sub>8</sub>·2DMSO

| Identification code               | [CH <sub>3</sub> NH <sub>3</sub> ] <sub>2</sub> Pb <sub>3</sub> I <sub>8</sub> ·2DMSO                      |
|-----------------------------------|------------------------------------------------------------------------------------------------------------|
| Empirical formula                 | C <sub>6</sub> H <sub>24</sub> I <sub>8</sub> N <sub>2</sub> O <sub>2</sub> Pb <sub>3</sub> S <sub>2</sub> |
| Formula weight                    | 1857.16                                                                                                    |
| Temperature                       | 296(2) K                                                                                                   |
| Wavelength                        | 0.71073 Å                                                                                                  |
| Crystal system                    | Orthorhombic                                                                                               |
| Space group                       | Cmc2 <sub>1</sub>                                                                                          |
| Unit cell dimensions              | a = 4.6212(13) Å, a = 90°.<br>b = 27.484(8) Å, b = 90°.<br>c = 26.923(7) Å, c = 90°.                       |
| Volume                            | 3419.5(16) Å <sup>3</sup>                                                                                  |
| Z                                 | 4                                                                                                          |
| Density (calculated)              | 3.607 g/cm <sup>3</sup>                                                                                    |
| Absorption coefficient            | 22.084 mm <sup>-1</sup>                                                                                    |
| F(000)                            | 3168                                                                                                       |
| Crystal size                      | 0.40 x 0.02 x 0.02 mm <sup>3</sup>                                                                         |
| Theta range for data collection   | 1.48 to 29.34°.                                                                                            |
| Index ranges                      | -4 ≤ h ≤ 6, -37 ≤ k ≤ 34, -<br>36 ≤ l ≤ 32                                                                 |
| Reflections collected             | 9176                                                                                                       |
| Independent reflections           | 4384 [R(int) = 0.0841]                                                                                     |
| Completeness to theta = 25.00°    | 99.7 %                                                                                                     |
| Absorption correction             | Psi-scan                                                                                                   |
| Max. and min. transmission        | 0.8401 and 0.6129                                                                                          |
| Refinement method                 | Full-matrix least-squares on<br>F <sup>2</sup>                                                             |
| Data / restraints / parameters    | 4384 / 1 / 123                                                                                             |
| Goodness-of-fit on F <sup>2</sup> | 0.836                                                                                                      |
| Final R indices [I > 2σ(I)]       | R1 = 0.0538, wR2 = 0.1053                                                                                  |
| R indices (all data)              | R1 = 0.1237, wR2 = 0.1217                                                                                  |
| Absolute structure parameter      | 0.42(1)                                                                                                    |
| Extinction coefficient            | 0.00005(1)                                                                                                 |
| Largest diff. peak and hole       | 1.395 and -1.390 e.Å <sup>-3</sup>                                                                         |

**Table S2.** Atomic coordinates ( $\times 10^4$ ) and equivalent isotropic displacement parameters ( $\text{\AA}^2 \times 10^3$ ) for  $[\text{CH}_3\text{NH}_3]_2\text{Pb}_3\text{I}_8 \cdot 2\text{DMSO}$ .  $U(\text{eq})$  is defined as one third of the trace of the orthogonalized  $U^{ij}$  tensor.

|       | x        | y        | z        | $U(\text{eq})$ |
|-------|----------|----------|----------|----------------|
| N(1)  | 5000     | 3623(14) | 8214(14) | 72(10)         |
| C(1)  | 5000     | 3692(19) | 7622(18) | 96(17)         |
| N(2)  | 5000     | 8658(16) | 2797(16) | 105(14)        |
| C(2)  | 5000     | 8818(17) | 2276(16) | 63(11)         |
| S(1)  | 1440(30) | 4466(6)  | 8936(6)  | 58(4)          |
| O(1)  | 0        | 4045(10) | 8576(11) | 66(8)          |
| C(3)  | 0        | 5032(13) | 8794(13) | 46(9)          |
| C(4)  | 0        | 4332(18) | 9550(16) | 73(14)         |
| S(2)  | 8660(30) | 8018(5)  | 1512(5)  | 50(4)          |
| O(2)  | 10000    | 8402(10) | 1882(8)  | 58(8)          |
| C(5)  | 10000    | 8136(15) | 942(14)  | 50(10)         |
| C(6)  | 10000    | 7491(18) | 1654(18) | 87(16)         |
| Pb(1) | 5000     | 1217(1)  | 306(1)   | 39(1)          |
| Pb(2) | 0        | 105(1)   | 1348(1)  | 44(1)          |
| Pb(3) | 0        | 2350(1)  | -745(1)  | 45(1)          |
| I(1)  | 0        | 430(1)   | 96(1)    | 43(1)          |
| I(2)  | 0        | 2018(1)  | 498(1)   | 44(1)          |
| I(3)  | 5000     | 967(1)   | 1483(1)  | 44(1)          |
| I(4)  | 5000     | 1492(1)  | -844(1)  | 47(1)          |
| I(5)  | -5000    | -628(1)  | 1046(1)  | 48(1)          |
| I(6)  | -5000    | 3113(1)  | -512(1)  | 49(1)          |
| I(7)  | 0        | -142(1)  | 2444(1)  | 59(1)          |
| I(8)  | 0        | 2542(1)  | -1845(1) | 60(1)          |

## 6. Photovoltaic parameters of devices fabricated using pure DMF based precursor solution

**Table S3.** Photovoltaic parameters of devices fabricated with pure DMF based precursor solution and different solvent treatment delay time.

| Delay Time | $V_{oc}$ / V | $J_{sc}$ / mA cm <sup>-2</sup> | FF        | PCE / %   |
|------------|--------------|--------------------------------|-----------|-----------|
| 5 s        | 0.79±0.03    | 16.71±0.62                     | 0.57±0.06 | 7.59±1.17 |
| 10 s       | 0.48±0.05    | 7.43±0.82                      | 0.50±0.01 | 1.78±0.30 |
| 15 s       | /            | /                              | /         | /         |

## 7. Photovoltaic performance of optimized device measured under different conditions

**Table S4.** Photovoltaic parameters obtained with different scan directions and scan rates of the solvent-assisted deposition method based device obtaining the highest PCE; Reverse: scan from 1.0 to -0.2 V, Forward: scan from -0.2 to 1.0 V.

| Scan direction | Scan Rate/ms | $V_{oc}$ / V | $J_{sc}$ / mA cm <sup>-2</sup> | FF / %    | PCE / %    |
|----------------|--------------|--------------|--------------------------------|-----------|------------|
| Reverse        | 50           | 0.85         | 20.2                           | 62.68     | 10.83      |
| Reverse        | 100          | 0.86         | 20.1                           | 60.87     | 10.44      |
| Reverse        | 200          | 0.86         | 19.7                           | 60.39     | 10.18      |
| Reverse        | 400          | 0.86         | 19.5                           | 59.47     | 9.94       |
| Average value  | /            | 0.86         | 19.87±0.32                     | 60.9±1.35 | 10.35±0.38 |
| Forward        | 50           | 0.87         | 20.0                           | 59.75     | 10.35      |
| Forward        | 100          | 0.86         | 19.3                           | 61.02     | 10.13      |
| Forward        | 200          | 0.86         | 19.2                           | 62.44     | 10.30      |
| Forward        | 400          | 0.86         | 19.2                           | 62.63     | 10.37      |
| Average value  | /            | 0.86         | 19.42±0.39                     | 61.5±1.35 | 10.29±0.11 |

## References

- [1] L. Etgar, P. Gao, Z. Xue, Q. Peng, A. K. Chanderan, B. Liu, M. K. Nazeeruddin and M. Grätzel, *J. Am. Chem. Soc.*, 2012, **134**, 17396-17399.
- [2] SAINT, version 7.60A; Bruker AXS Inc.: Madison, Wisconsin, USA, 2002-2014.
- [3] APEX2, Version 2014. 5-0; Bruker AXS Inc.: Madison, Wisconsin, USA, 2014.
- [4] Sheldrick, G. M. SHELXTL; Bruker AXS Inc.: Madison, Wisconsin, USA, 2005.
